1 **Trends and distribution of birth asphyxia, Uganda, 2017-2020: A retrospective analysis of**  
2 **public health surveillance data**

3 Allan Komakech<sup>1,2,3\*</sup>, Freda L. Aceng<sup>4</sup>, Stella M. Migamba<sup>1,2</sup>, Petranilla Nakamya<sup>1</sup>, Robert  
4 Mutumba<sup>2</sup>, Lilian Bulage<sup>1</sup>, Benon Kwesiga<sup>1</sup>, Alex R. Ario<sup>1</sup>

5 **Institutional affiliations**

6 <sup>1</sup>Uganda National Institute of Public Health, Kampala, Uganda

7 <sup>2</sup>Reproductive Health Department, Ministry of Health, Kampala, Uganda

8 <sup>3</sup>Clarke International University, Kampala, Uganda

9 <sup>4</sup>Department of Integrated Epidemiology, Surveillance and Public Health Emergencies, Ministry  
10 of Health, Kampala, Uganda

11 **\*Correspondence:** Allan Komakech Tel: +256789185617, Email: [akomackech@musph.ac.ug](mailto:akomackech@musph.ac.ug)

13 **Abstract**

14 **Background:** During 2018-2020, almost half of all neonatal deaths reviewed in Uganda were due  
15 to birth asphyxia. In 2015, Uganda adopted the Every Newborn Action Plan interventions to  
16 renew focus on surveillance for birth asphyxia and other childhood-related illnesses. In 2016,  
17 Ministry of Health implemented an evidence-based educational program for birth attendants  
18 about neonatal resuscitation techniques to improve management of birth asphyxia. Birth  
19 asphyxia is reported on a monthly basis in Uganda as part of routine reporting. We described the  
20 trends and distribution of birth asphyxia in Uganda during 2017–2020 following these renewed  
21 efforts.

22 **Methods:** We analysed birth asphyxia surveillance data from the District Health Information  
23 System 2 during January 2017–December 2020. We calculated incidence of birth asphyxia per  
24 1,000 deliveries at district, regional, and national levels. We used line graphs to demonstrate the  
25 trend of birth asphyxia incidence with the corresponding reporting rates at national and regional  
26 levels and used logistic regression to evaluate significance of the trends. Using choropleth maps,  
27 we described the distribution of birth asphyxia incidence at district level.

28 **Results:** The average national annual incidence of birth asphyxia increased by 4.5% from 2017 to  
29 2020 (OR=1.05; 95%CI=1.04-1.05, p=0.001), with national quarterly reporting rates of 70-80%  
30 over the same period. Incidence in the Northern and Eastern Regions increased 6% (OR=1.06;  
31 95%CI=1.05-1.07, p=0.001) and 5% (OR=1.05; 95%CI=1.03-1.05, p=0.001), respectively, over the  
32 study period. Bundibugyo, Iganga, and Mubende Districts had rates of >60/1,000 during each of  
33 the four years of the study period. The least affected district was Kazo District, with an overall  
34 incidence of 3/1,000 over the study period.

35 **Conclusion:** The incidence of birth asphyxia increased nationally from 2017-2020. Continuous  
36 capacity-building in birth asphyxia management, with emphasis on the most affected districts,  
37 could reduce the burden of this public health problem in Uganda.

38

39 **Keywords:** Trends; Distribution; Birth asphyxia; Uganda

40

## 42 **Introduction**

43 The World Health Organization (WHO) defines birth asphyxia as the failure to initiate and sustain  
44 breathing at birth (1). Birth asphyxia is a leading cause of brain damage among newborn  
45 children, with up to 80% of survivors suffering from disabilities, developmental delays, palsy,  
46 intellectual disabilities, and behavioural problems (2–4) Worldwide, birth asphyxia is responsible  
47 for an estimated 900,000 neonatal deaths per year (5). Birth asphyxia incidence in developing  
48 countries has previously been reported to be 10 times that in developed countries (6). Studies  
49 done in Bangladesh (7) and in Nigeria (8) observed that birth asphyxia was responsible for 39%  
50 and 23.3%, respectively, of all neonatal deaths.

51 Risk factors for birth asphyxia are grouped according to whether they occur before birth  
52 (antepartum risk factors), during birth (intrapartum risk factors), or after birth (postpartum risk  
53 factors). Antepartum risk factors include severe maternal hypotension or hypertensive diseases  
54 during pregnancy, history of stillbirth, young maternal age, and advanced maternal age.  
55 Intrapartum risk factors include malpresentation of the fetus, a prolonged second stage of  
56 labour, and home delivery. Postpartum risk factors include low birth weight, high birth weight,  
57 preterm delivery, and poor resuscitation efforts (9–12). The majority of these are preventable, as  
58 evidenced by the regional variations across the world

59  
60 During 2018-2020, almost half of all neonatal deaths reviewed in Uganda were due to birth  
61 asphyxia (13). Studies done in Uganda implicated antepartum and intrapartum risk factors,  
62 including complexities of referral systems, non-attendance of antenatal care by mothers,  
63 knowledge gaps among health workers, lack of equipment and high health worker-to-patient  
64 ratio as the major culprits (14–16). In 2015, Uganda adopted the Every Newborn Action Plan  
65 (17), which included a renewed focus on surveillance of birth asphyxia cases and development of

66 a national strategic plan on managing birth asphyxia and other childhood illnesses. Furthermore,  
67 in 2016 the Ministry of Health rolled out the Helping Babies Breathe (HBB) initiative, meant to  
68 improve prevention and management of birth asphyxia by health workers. However, the impact  
69 of these interventions on birth asphyxia incidence was unknown. We described the trends and  
70 distribution of birth asphyxia in Uganda during 2017-2020, the era following these renewed  
71 efforts.

72

## 73 **Materials and Methods**

### 74 **Study setting**

75 Uganda is located in East Africa with an estimated population of 41.6 million people (18). There  
76 are four regions in Uganda, each of which is partitioned into 135 districts and 11 cities (18). The  
77 health system comprises public and private health sectors and healthcare is provided through a  
78 decentralized system in which services are delivered across seven tiers. These include national  
79 referral hospitals, regional referral hospitals, district hospitals, Health Centres IV (HCIV), Health  
80 Centres III (HCIII), Health Centres II (HCII), and community health workers locally referred to as  
81 the Village Health Teams (VHTs) (19). In Uganda, birth asphyxia is a condition that can be  
82 managed at HCII facilities and above.

83

### 84 **Study design and data source**

85 We conducted a nationwide surveillance data analysis of birth asphyxia cases from 2017 to 2020  
86 using data abstracted from the Uganda District Health Information System 2 (DHIS2), a web-  
87 based reporting tool introduced to Uganda in 2012. Data on birth asphyxia data are routinely  
88 generated at health facilities using the integrated maternity register.

89 The data from these registers are aggregated into a health facility monthly report (paper form)  
90 which is submitted to health sub-district and then to the district health offices. At the district  
91 health office, data from the paper-based reports are entered into DHIS2. Data in DHIS2 are then  
92 grouped at national, regional, district, sub-county, and facility levels. At the national level, the  
93 Reproductive and Infant Health Department of the Ministry of Health and other stakeholders use  
94 data from DHIS2 to make decisions and plan interventions on reproductive and infant health.

95

### 96 **Study variables, data abstraction and analysis**

97 We calculated national quarterly reporting rates of birth asphyxia by dividing the available  
98 monthly reports per quarter for all districts by the expected monthly reports for all districts per  
99 quarter. We abstracted data for birth asphyxia cases and total deliveries during 2017–2020 from  
100 the DHIS2. We disaggregated the data into national, regional, and district levels. We calculated  
101 the annual incidence rates per 1,000 for birth asphyxia cases at national, regional, and district  
102 levels by dividing the total birth asphyxia cases during the year by the total deliveries during that  
103 year and multiplying by 1,000. We obtained the mean annual incidence rates for the national  
104 and regional levels by adding annual incidence rates for the four years of study and dividing by  
105 four.

106 We plotted the quarterly mean incidence of birth asphyxia against the study period in years to  
107 present the trend in incidence at national and regional levels from 2017–2020 and used logistic  
108 regression to establish the significance of the trends. We also used choropleth maps generated  
109 using Quantum Geographic Information System (QGIS) to present the district distribution of the  
110 birth asphyxia incidence across the country.

112 **Results**

113 **Trend of annual incidence rate of birth asphyxia, national level, Uganda, 2017–2020**

114 In Uganda, there were a total of 4,625,336 deliveries and 134,801 birth asphyxia cases during  
115 2017-2020. The average national incidence of birth asphyxia over the four years in Uganda was  
116 29 per 1,000 deliveries. The highest annual incidence (32 birth asphyxia cases per 1,000  
117 deliveries) over the four years was recorded in 2020.

118 The incidence of birth asphyxia increased from 2017–2020 (OR 1.045; 95% CI 1.04, 1.05) (**Figure**  
119 **1**). Reporting rates remained fairly stable (between 70% and 80%) from January 2017 to  
120 December 2020.

121 **Figure 1: Quarterly trends of birth asphyxia incidence/1,000 total deliveries, Uganda, 2017–**  
122 **2020**

123 **Trend of annual incidence rate of birth asphyxia cases, regional level, Uganda, 2017-2020**

124 The increase in the incidence rates of birth asphyxia/1,000 total deliveries were limited to the  
125 Northern (7%) and Eastern (5%) regions of Uganda, while rates in other regions remained  
126 unchanged (**Table 1**). Central Region registered the highest mean annual incidence rate of 30  
127 birth asphyxia cases/1,000 total deliveries and Northern Region registered the lowest mean  
128 incidence rate of 28 per 1,000 deliveries over the four years.

129 **Table 1: Significance of trends of birth asphyxia incidence at regional level, Uganda, 2017–2020**

| Region 2017/2020 | Odds Ratio | 95% CI    | P-Value |
|------------------|------------|-----------|---------|
| Northern         | 1.07       | 1.05-1.08 | <0.001* |
| Eastern          | 1.05       | 1.04-1.06 | <0.001* |
| Central          | 1.00       | 0.99-1.01 | 0.54    |
| Western          | 0.99       | 0.99-1.01 | 0.75    |

130 \*indicates p value<0.05

131 **Spatial distribution of birth asphyxia incidence rates, district level, Uganda, 2017-2020**

132 There was minimal spatial clustering of high-incidence districts for birth asphyxia during 2017-  
133 2020. However, specific districts had persistently high birth asphyxia incidence rates over the  
134 study period; these included Bundibugyo, Mubende, and Iganga (**Figure 2**).

135 **Figure 2: Spatial distribution of birth asphyxia cases/1,000 total deliveries, Uganda, 2017–2020**



## 137 Discussion

138 Birth asphyxia incidence rates increased significantly in Uganda during 2017-2020, specifically  
139 due to increases in the Northern and Eastern Regions. Spatial trends showed minimal clustering  
140 of birth asphyxia incidence in the country. However, specific districts faced persistently high birth  
141 asphyxia incidence rates over the four years.

142 While the reasons for the increase in birth asphyxia incidence over the study period is not clearly  
143 understood, the burden of birth asphyxia is particularly high in East and Central Africa compared  
144 to other regions of Sub-Saharan Africa (20,21) This is due to poor obstetrics coverage, inequity  
145 and inequality resulting from gaps in local health financing models, inaccessible health facilities,  
146 socio-cultural norms, low literacy levels, shortage in health workers and supplies, low level of  
147 health service utilization and inadequate resource allocation to healthcare (21–23). Funding  
148 health services can lead to provision of services vital to reduce and prevent birth asphyxia.

149 The highest incidence of birth asphyxia during the study period occurred in 2020 at 32 birth  
150 asphyxia cases per 1,000 deliveries compared to 28/1000 total deliveries in the three previous  
151 years. This is likely due to the delayed access of pregnant women to health facilities following the  
152 imposition of the COVID-19 lockdown travel restrictions (24). A study in a rural hospital in  
153 Central Uganda showed an increase of 7% in birth asphyxia incidence during the early phase of  
154 the COVID-19 lockdown versus before the lockdown (25). The COVID-19 pandemic caused  
155 massive disruptions throughout many Africa countries affecting access to health facilities as  
156 evidenced in studies in Malawi, Ethiopia and Ghana (26–28). Furthermore, crisis situations do  
157 not necessarily lead to reduction in reproduction and yet access to health services is greatly  
158 affected during such periods. Special considerations should therefore be ensured to facilitate the  
159 access of pregnant women to health facilities during lockdown situations to improve access to  
160 health care.

161 While several districts had intermittently high rates of birth asphyxia, Bundibugyo, Iganga, and  
162 Mubende districts had persistently high incidences of >60 cases per 1,000 deliveries. This is  
163 approximately twice the national average rate. Kazo District was the least affected district with 3  
164 cases of birth asphyxia/1,000 deliveries. Although no particular reason can be identified to  
165 explain the non-clustered patterns of birth asphyxia in Uganda, all regions of Uganda have their  
166 fair share of poverty (29), issues with access to- and availability of health facilities (30), and  
167 differing cultural and social norms , known factors that can lead to birth asphyxia. Studies done  
168 to establish socio-demographic and health facility factors associated with birth asphyxia,  
169 particularly in the highly affected regions would be beneficial.

#### 170 **Limitations**

171 Secondary data in DHIS2 is limited in terms of variables to provide a sufficient assessment of  
172 birth asphyxia incidence in Uganda. Studies using primary data to determine associated factors  
173 may be more beneficial in understanding increasing birth asphyxia trends in Uganda. This will  
174 help to improve already-existing evidence-based interventions. Secondly, given the low average  
175 reporting rates over the study period (<80%), a true representation of birth asphyxia incidence  
176 might be limited. It should also be noted that since some deliveries occur outside the hospital, it  
177 is possible that the incidence rates we are reporting here are an underestimate.

#### 178 **Conclusion**

179 Birth asphyxia incidence increased over the four years of our study period despite a decrease in  
180 reporting rates. The highest incidence over the four years was recorded in 2020. Bundibugyo,  
181 Iganga, and Mubende districts had a persistently high birth asphyxia incidence (>60/1,000  
182 deliveries). Kazo district was the least affected district (3/1000 deliveries).

183 We recommend the Ministry of Health to emphasize consistent reporting of birth asphyxia to  
184 ensure useful surveillance data. We also recommend continuous capacity building in managing  
185 birth asphyxia, with emphasis on the most affected districts.

187 **List of Abbreviations**

188 CI: Confidence Interval

189 DHIS-2: District Health Information System-version 2

190 HBB: Helping Babies Breath

191 MoH: Ministry of Health

192 OR: Odds Ratio

193 QGIS: Quantum Geographic Information System

194 WHO: World Health Organization

195

196 **Acknowledgements**

197 We would like to thank the Ministry of Health for providing access to DHIS2 data that was used  
198 for this analysis. We appreciate the technical support provided by the Reproductive Health  
199 Department of the Ministry of Health. Finally, we thank the US-CDC for supporting the activities  
200 of the Uganda Public Health Fellowship Program (UPHFP).

201

## 203 References

- 204 1. World Health Organization (WHO). Newborn Health [Internet]. [cited 2022 Nov 25].  
205 Available from: [https://www.who.int/teams/maternal-newborn-child-adolescent-health-](https://www.who.int/teams/maternal-newborn-child-adolescent-health-and-ageing/newborn-health/perinatal-asphyxia)  
206 [and-ageing/newborn-health/perinatal-asphyxia](https://www.who.int/teams/maternal-newborn-child-adolescent-health-and-ageing/newborn-health/perinatal-asphyxia)
- 207 2. The long-term health, social, and financial burden of hypoxic–ischaemic encephalopathy -  
208 Eunson - 2015 - Developmental Medicine & Child Neurology - Wiley Online Library  
209 [Internet]. [cited 2022 Dec 9]. Available from:  
210 <https://onlinelibrary.wiley.com/doi/full/10.1111/dmcn.12727>
- 211 3. Ahearne CE. Short and long term prognosis in perinatal asphyxia: An update. World J Clin  
212 Pediatr [Internet]. 2016 [cited 2022 Dec 9];5(1):67. Available from:  
213 <https://www.wjgnet.com/2219-2808/full/v5/i1/67.htm>
- 214 4. Halloran DR, McClure E, Chakraborty H, Chomba E, Wright LL, Carlo WA. Birth asphyxia  
215 survivors in a developing country. J Perinatol 2009 293 [Internet]. 2008 Nov 27 [cited 2022  
216 Dec 9];29(3):243–9. Available from: <https://www.nature.com/articles/jp2008192>
- 217 5. World Health Organization (WHO). Newborn Health [Internet]. [cited 2022 Dec 9].  
218 Available from: [https://www.who.int/teams/maternal-newborn-child-adolescent-health-](https://www.who.int/teams/maternal-newborn-child-adolescent-health-and-ageing/newborn-health/perinatal-asphyxia)  
219 [and-ageing/newborn-health/perinatal-asphyxia](https://www.who.int/teams/maternal-newborn-child-adolescent-health-and-ageing/newborn-health/perinatal-asphyxia)
- 220 6. Lawn JE, Lee ACC, Kinney M, Sibley L, Carlo WA, Paul VK, et al. Two million intrapartum-  
221 related stillbirths and neonatal deaths: Where, why, and what can be done? Int J Gynecol  
222 Obstet. 2009 Oct 1;107(SUPPL.):S5–19.
- 223 7. Sampa RP, Hossain QZ, Sultana S. Observation of Birth Asphyxia and Its Impact on  
224 Neonatal Mortality in Khulna Urban Slum Bangladesh. Int J Adv Nutr Heal Sci. 2013 Dec

225 13;1(1):1–8.

226 8. Adebami OJ. Maternal and fetal determinants of mortality in babies with birth asphyxia at  
227 Osogbo, Southwestern Nigeria. *Glo Adv Res J Med Med Sci*. 2015;4(6):270–6.

228 9. Aslam HM, Saleem S, Afzal R, Iqbal U, Saleem SM, Shaikh MWA, et al. “Risk factors of birth  
229 asphyxia.” *Ital J Pediatr* 2014 401 [Internet]. 2014 Dec 20 [cited 2021 Jul 22];40(1):1–9.  
230 Available from: <https://ijponline.biomedcentral.com/articles/10.1186/s13052-014-0094-2>

231 10. Igboanugo S, Chen A, Mielke JG. Maternal risk factors for birth asphyxia in low-resource  
232 communities. A systematic review of the literature.  
233 <https://doi.org/101080/0144361520191679737> [Internet]. 2019 Nov 16 [cited 2021 Jul  
234 22];40(8):1039–55. Available from:  
235 <https://www.tandfonline.com/doi/abs/10.1080/01443615.2019.1679737>

236 11. Bayih WA, Yitbarek GY, Aynalem YA, Abate BB, Tesfaw A, Ayalew MY, et al. Prevalence and  
237 associated factors of birth asphyxia among live births at Debre Tabor General Hospital,  
238 North Central Ethiopia. *BMC Pregnancy Childbirth* 2020 201 [Internet]. 2020 Oct 28 [cited  
239 2021 Jul 22];20(1):1–12. Available from:  
240 [https://bmcpregnancychildbirth.biomedcentral.com/articles/10.1186/s12884-020-03348-](https://bmcpregnancychildbirth.biomedcentral.com/articles/10.1186/s12884-020-03348-2)  
241 [2](https://bmcpregnancychildbirth.biomedcentral.com/articles/10.1186/s12884-020-03348-2)

242 12. Panna S. Risk Factors for Birth Asphyxia in Newborns Delivered at Nongkhai Hospital.  
243 *Srinagarind Med Journal-ศรีนครินทร์เวชสาร* [Internet]. 2020 Jun 20 [cited 2021 Jul  
244 22];35(3):278–86. Available from: <https://thaidj.org/index.php/SMNJ/article/view/9123>

245 13. Uganda M. FY 2019\_2020 Final MPDSR Report for Printing. 2020.

246 14. Ayebare E, Ndeezi G, Hjelmstedt A, Nankunda J, Tumwine JK, Hanson C, et al. Health care

- 247 workers' experiences of managing foetal distress and birth asphyxia at health facilities in  
248 Northern Uganda. *Reprod Health* [Internet]. 2021 Dec 1 [cited 2022 Mar 23];18(1):1–11.  
249 Available from: [https://reproductive-health-](https://reproductive-health-journal.biomedcentral.com/articles/10.1186/s12978-021-01083-1)  
250 [journal.biomedcentral.com/articles/10.1186/s12978-021-01083-1](https://reproductive-health-journal.biomedcentral.com/articles/10.1186/s12978-021-01083-1)
- 251 15. Arach AAO, Tumwine JK, Nakasujja N, Ndeezi G, Kiguli J, Mukunya D, et al. Perinatal death  
252 in Northern Uganda: incidence and risk factors in a community-based prospective cohort  
253 study. <https://doi.org/101080/1654971620201859823> [Internet]. 2021 [cited 2021 Jul  
254 20];14(1). Available from:  
255 <https://www.tandfonline.com/doi/abs/10.1080/16549716.2020.1859823>
- 256 16. Ayebare E, Jonas W, Ndeezi G, Nankunda J, Hanson C, Tumwine JK, et al. Fetal heart rate  
257 monitoring practices at a public hospital in Northern Uganda – what health workers  
258 document, do and say. <https://doi.org/101080/1654971620201711618> [Internet]. 2020  
259 Dec 31 [cited 2021 Jul 20];13(1). Available from:  
260 <https://www.tandfonline.com/doi/abs/10.1080/16549716.2020.1711618>
- 261 17. World Health Organisation. Every newborn action plan : Country progress tracking report.  
262 Who. 2014;58.
- 263 18. Uganda Bureau of Statistics (UBOS). uganda profile - Uganda Bureau of Statistics  
264 [Internet]. 2022. [cited 2022 Dec 13]. Available from: [https://www.ubos.org/uganda-](https://www.ubos.org/uganda-profile/)  
265 [profile/](https://www.ubos.org/uganda-profile/)
- 266 19. World Health Organization (WHO). HEALTH SITUATION-Uganda. 2018 [cited 2022 Dec 14];  
267 Available from: <http://apps.who.int/gho/data/node.cco>
- 268 20. Kinoti SN. Asphyxia of the newborn in east, central and southern Africa. *East Afr Med J*

- 269 [Internet]. 1993 Jul 1 [cited 2022 Dec 14];70(7):422–33. Available from:  
270 <https://europepmc.org/article/med/8293701>
- 271 21. Abekah-Nkrumah G. Trends in utilisation and inequality in the use of reproductive health  
272 services in Sub-Saharan Africa. BMC Public Health [Internet]. 2019 Nov 21 [cited 2022 Dec  
273 14];19(1):1–15. Available from: [https://link.springer.com/articles/10.1186/s12889-019-](https://link.springer.com/articles/10.1186/s12889-019-7865-z)  
274 [7865-z](https://link.springer.com/articles/10.1186/s12889-019-7865-z)
- 275 22. Waters D, Adeloje D, Woolham D, Wastnedge E, Patel S, Rudan I. Global birth prevalence  
276 and mortality from inborn errors of metabolism: a systematic analysis of the evidence. J  
277 Glob Health [Internet]. 2018 [cited 2022 Dec 14];8(2). Available from:  
278 [/pmc/articles/PMC6237105/](https://europepmc.org/article/med/3237105)
- 279 23. Pell C, Meñaca A, Were F, Afrah NA, Chatio S, Manda-Taylor L, et al. Factors Affecting  
280 Antenatal Care Attendance: Results from Qualitative Studies in Ghana, Kenya and Malawi.  
281 PLoS One [Internet]. 2013 Jan 15 [cited 2022 Dec 14];8(1):e53747. Available from:  
282 <https://journals.plos.org/plosone/article?id=10.1371/journal.pone.0053747>
- 283 24. Foundation ER. Sexual and Reproductive Health in Uganda under the Coronavirus  
284 Pandemic. 2020.
- 285 25. Hedstrom A, Mubiri P, Nyonyintono J, Nakakande J, Magnusson B, Vaughan M, et al.  
286 Outcomes in a Rural Ugandan Neonatal Unit Before and During the Early COVID-19  
287 Pandemic: A Retrospective Cohort Study. SSRN Electron J [Internet]. 2021 [cited 2021 Jul  
288 20]; Available from: <https://papers.ssrn.com/abstract=3872622>
- 289 26. Kazanga Chiumia I, Azariah Mosiwa B, Nkhonjera J, Kazanga B, Shingirai Mukondiwa A,  
290 Twalibu A, et al. Emerging public health challenges during the COVID-19 pandemic in



- 291 Malawi: A review. Public Heal Challenges [Internet]. 2022 Dec 1 [cited 2022 Dec  
292 14];1(4):e40. Available from: <https://onlinelibrary.wiley.com/doi/full/10.1002/puh2.40>
- 293 27. Zewdie A, Mose A, Yimer A, Melis T, Muhamed AN, Jemal AK. Essential maternal health  
294 service disruptions in Ethiopia during COVID 19 pandemic: a systematic review. BMC  
295 Women’s Heal 2022 221 [Internet]. 2022 Dec 6 [cited 2022 Dec 14];22(1):1–8. Available  
296 from: [https://bmcwomenshealth.biomedcentral.com/articles/10.1186/s12905-022-](https://bmcwomenshealth.biomedcentral.com/articles/10.1186/s12905-022-02091-4)  
297 02091-4
- 298 28. Asuming PO, Gaisie DA, Agula C, Bawah AA. Impact of Covid-19 on Maternal Health  
299 Seeking in Ghana. J Int Dev [Internet]. 2022 May 1 [cited 2022 Dec 14];34(4):919. Available  
300 from: [/pmc/articles/PMC9015309/](https://pmc/articles/PMC9015309/)
- 301 29. UNICEF. UGANDA’S MULTIDIMENSIONAL POVERTY PROFILE. [cited 2022 Dec 15]; Available  
302 from: [https://www.unicef.org/uganda/reports/multidimensional-child-poverty-and-](https://www.unicef.org/uganda/reports/multidimensional-child-poverty-and-deprivation-uganda-report-volume-one)  
303 deprivation-uganda-report-volume-one
- 304 30. Dowhaniuk N. Exploring country-wide equitable government health care facility access in  
305 Uganda. Int J Equity Health [Internet]. 2021 Dec 1 [cited 2022 Apr 6];20(1):1–19. Available  
306 from: <https://equityhealthj.biomedcentral.com/articles/10.1186/s12939-020-01371-5>

307

308

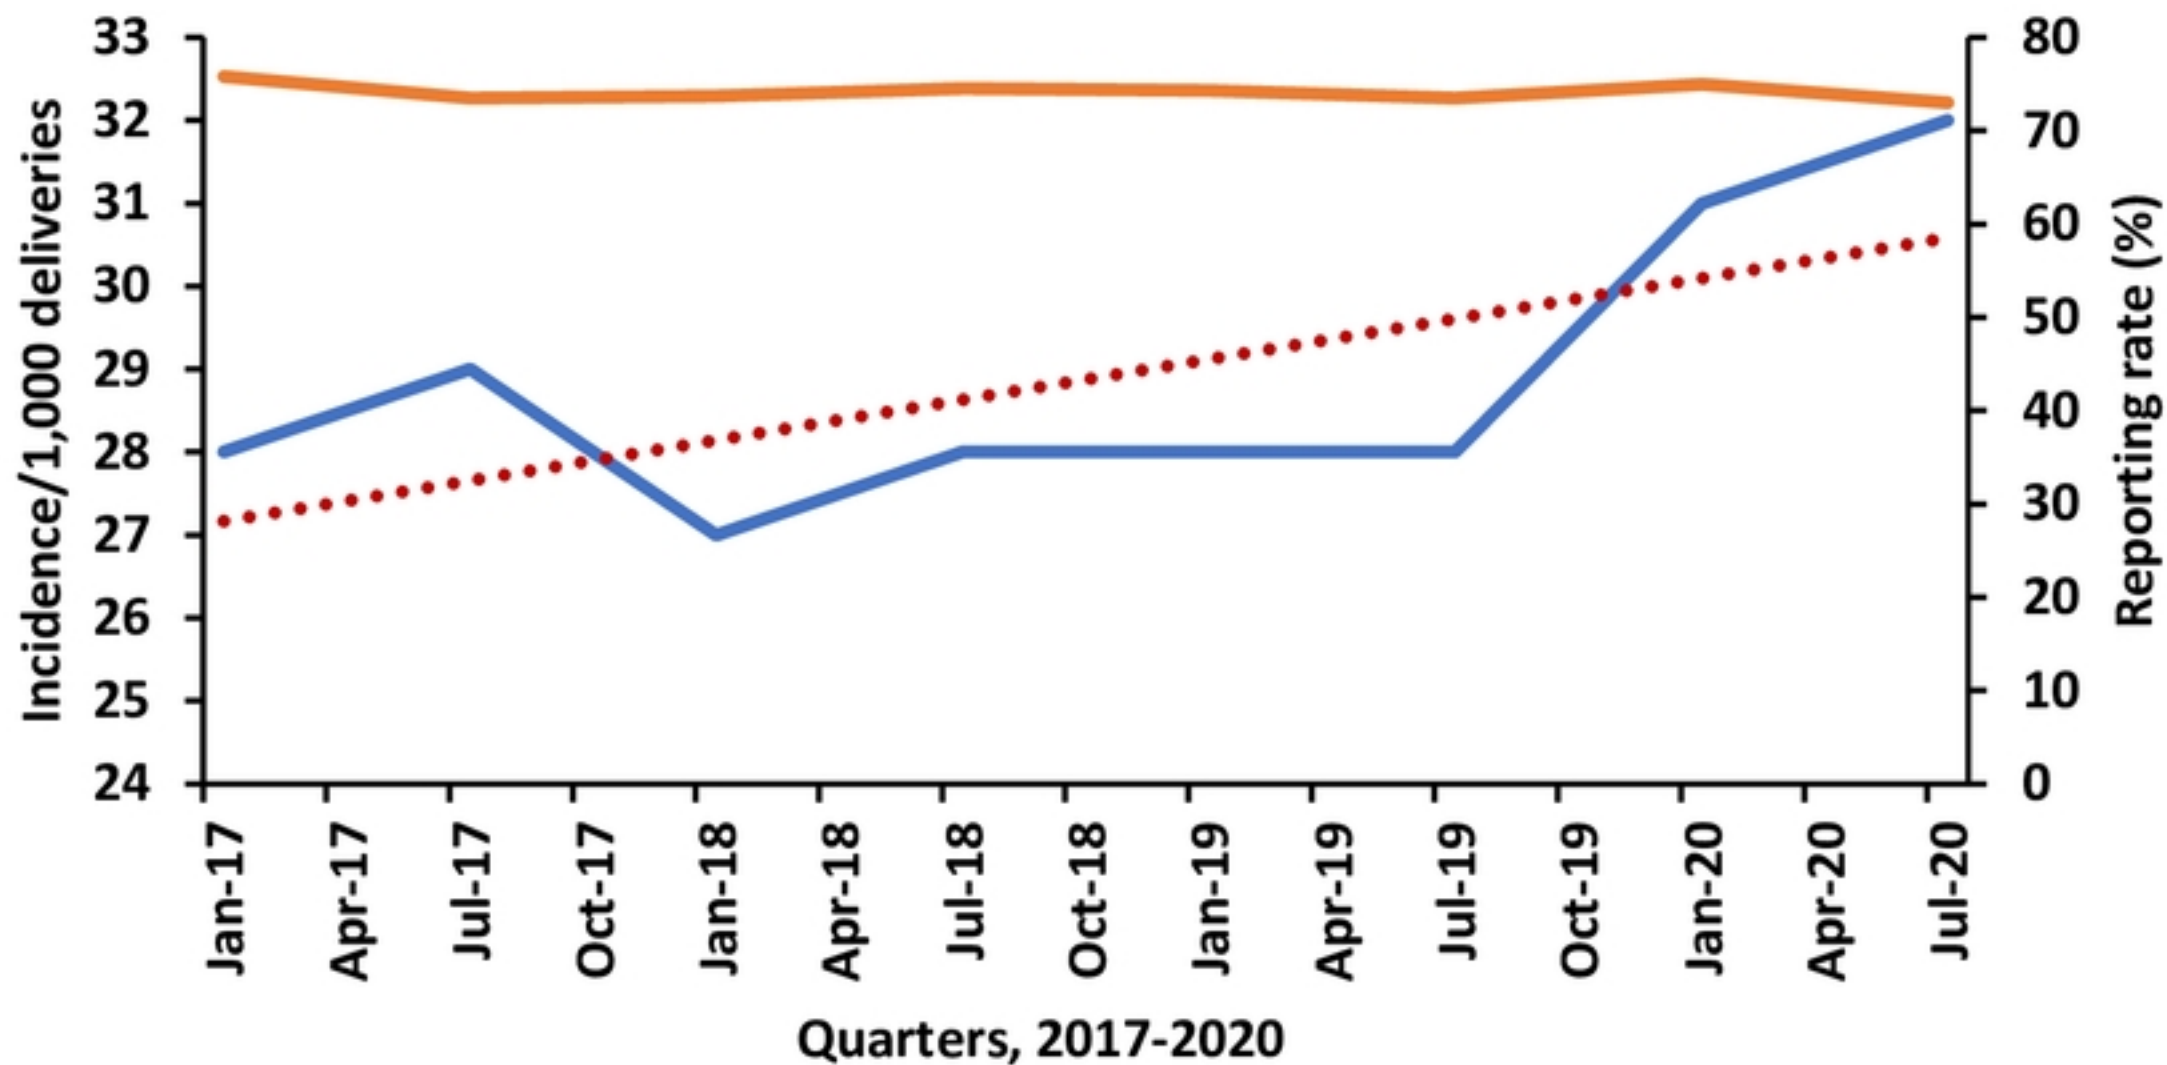

Quarterly trends of birth asphyxia incidence/1,000 total deliveries

2017

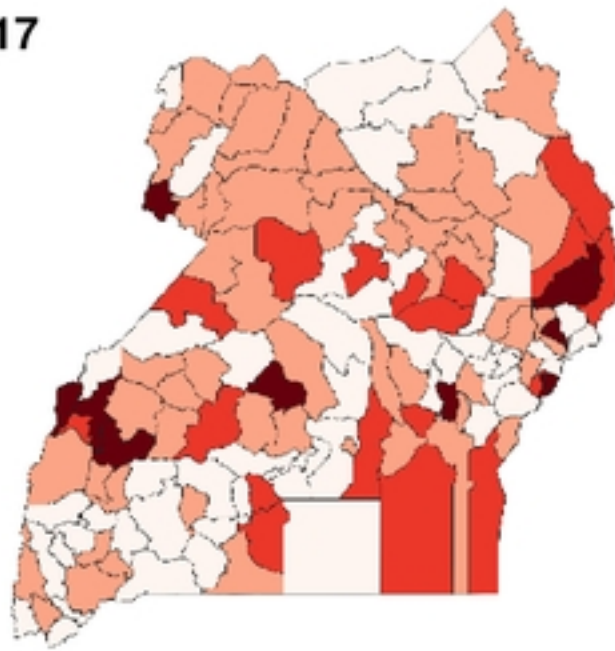

2018

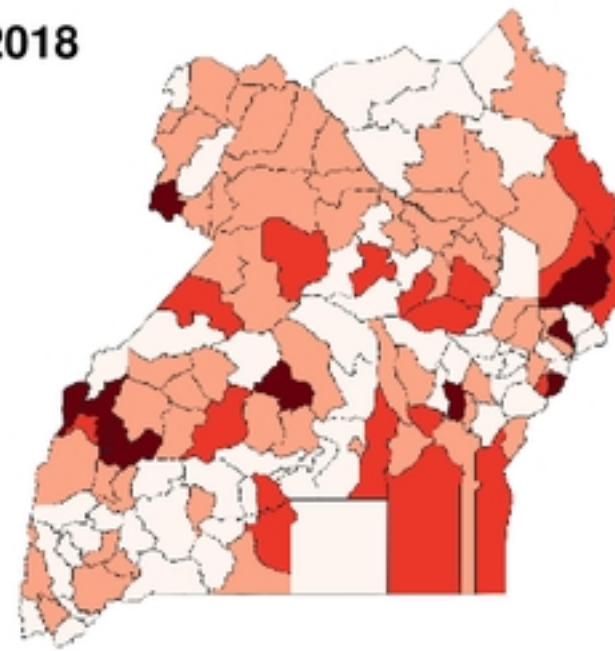

2019

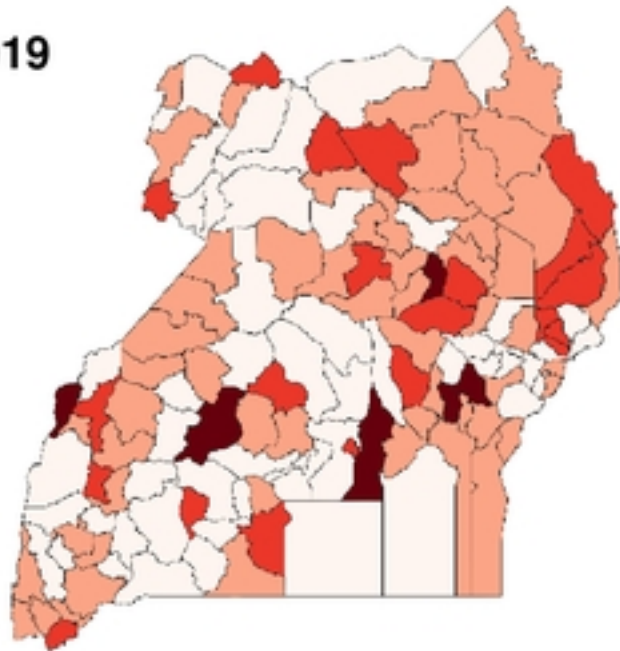

2020

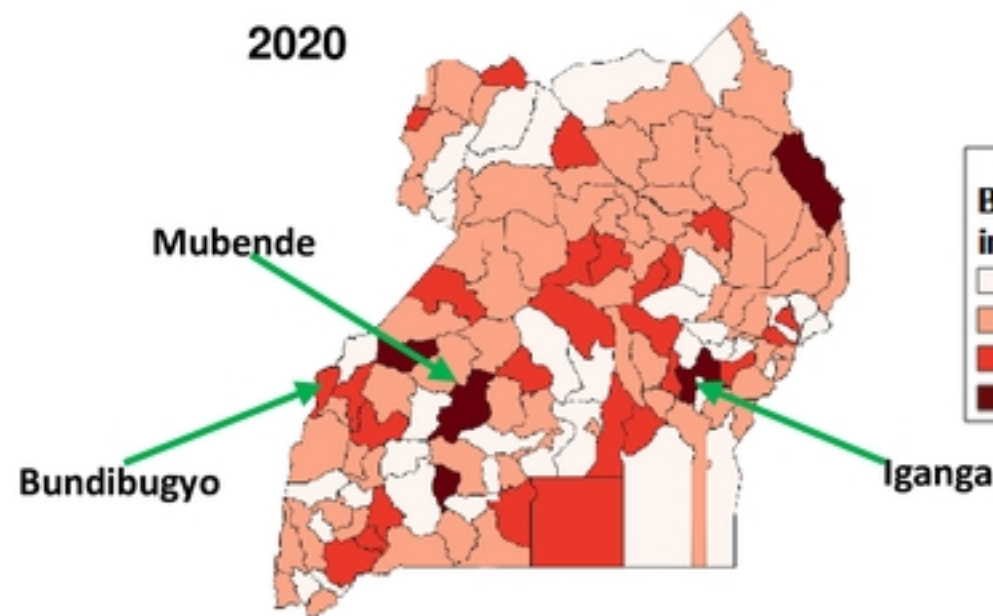

Spatial distribution of birth asphyxia cases/1,000 total deliveries,
